# Supplementary material for: Generation of Phenothiazine with Potent Anti-TLK1 Activity for Prostate Cancer Therapy
Source: PubMed Central journal article supplement (PMC7486443; doi:10.1016/j.isci.2020.101474), 2020-08-20

# <sup>1</sup>H NMR spectra of J54

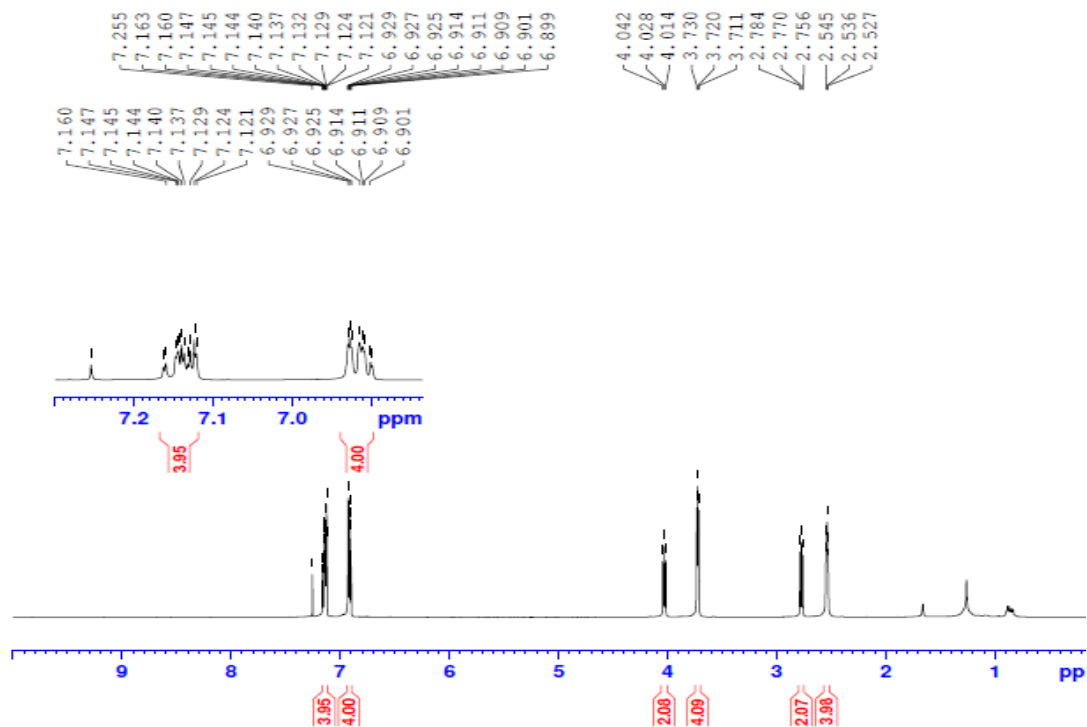

# <sup>13</sup>C NMR spectra of J54

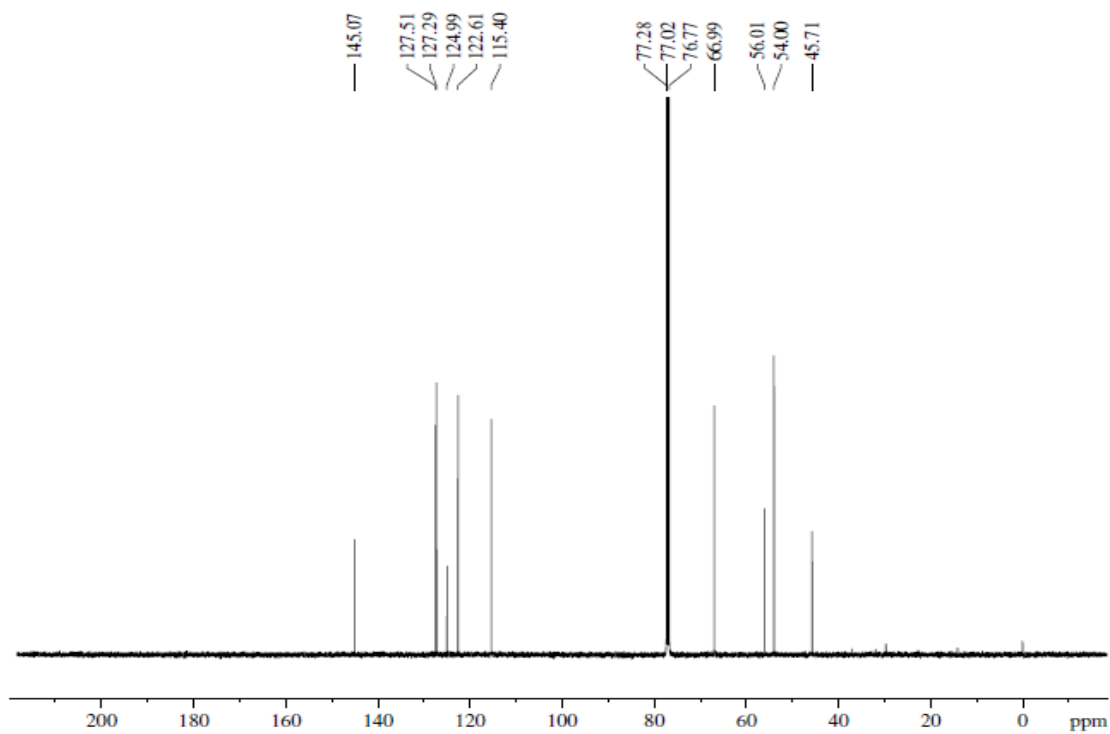

# Mass Spectra of J54

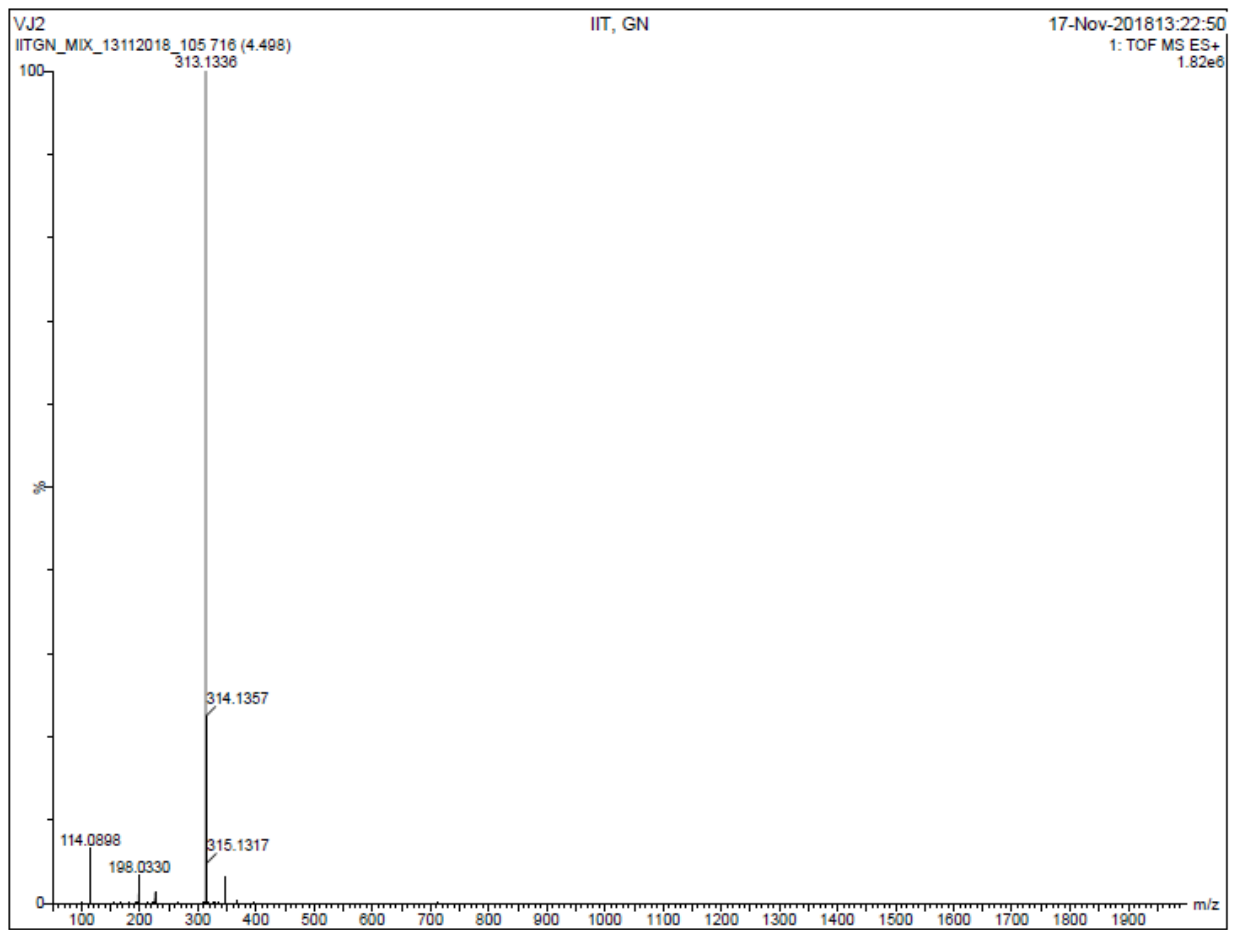

# <sup>1</sup>H NMR spectra of J54



# <sup>13</sup>C NMR spectra of J54



# Mass Spectra of J54



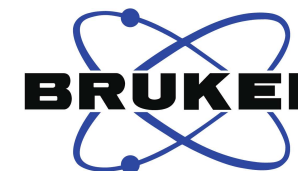

Current Data Parameter  
NAME May-1  
EXPNO 7  
PROCNO

F2 - Acquisition Param  
Date\_ 2018053  
Time 1.5  
INSTRUM spec  
PROBHD 5 mm PABBO BB  
PULPROG zgpg3  
TD 6553  
SOLVENT CDC1  
NS 204  
DS  
SWH 29761.90  
FIDRES 0.45413  
AQ 1.101004  
RG 200.0  
DW 16.80  
DE 6.5  
TE 300.  
D1 2.0000000  
D11 0.0300000  
TDO

=====  
CHANNEL f1 ==  
SFO1 125.750245  
NUC1 13  
P1 8.9  
PLW1 29.0000000

=====  
CHANNEL f2 ==  
SFO2 500.052000  
NUC2 1  
PCPD2 80.0  
PLW2 17.0000000  
PLW12 0.5206199  
PLW13 0.3332000

F2 - Processing parame  
SI 3276  
SF 125.737673  
WDW E  
SSB 0  
LB 1.0  
GB 0  
PC 1.4

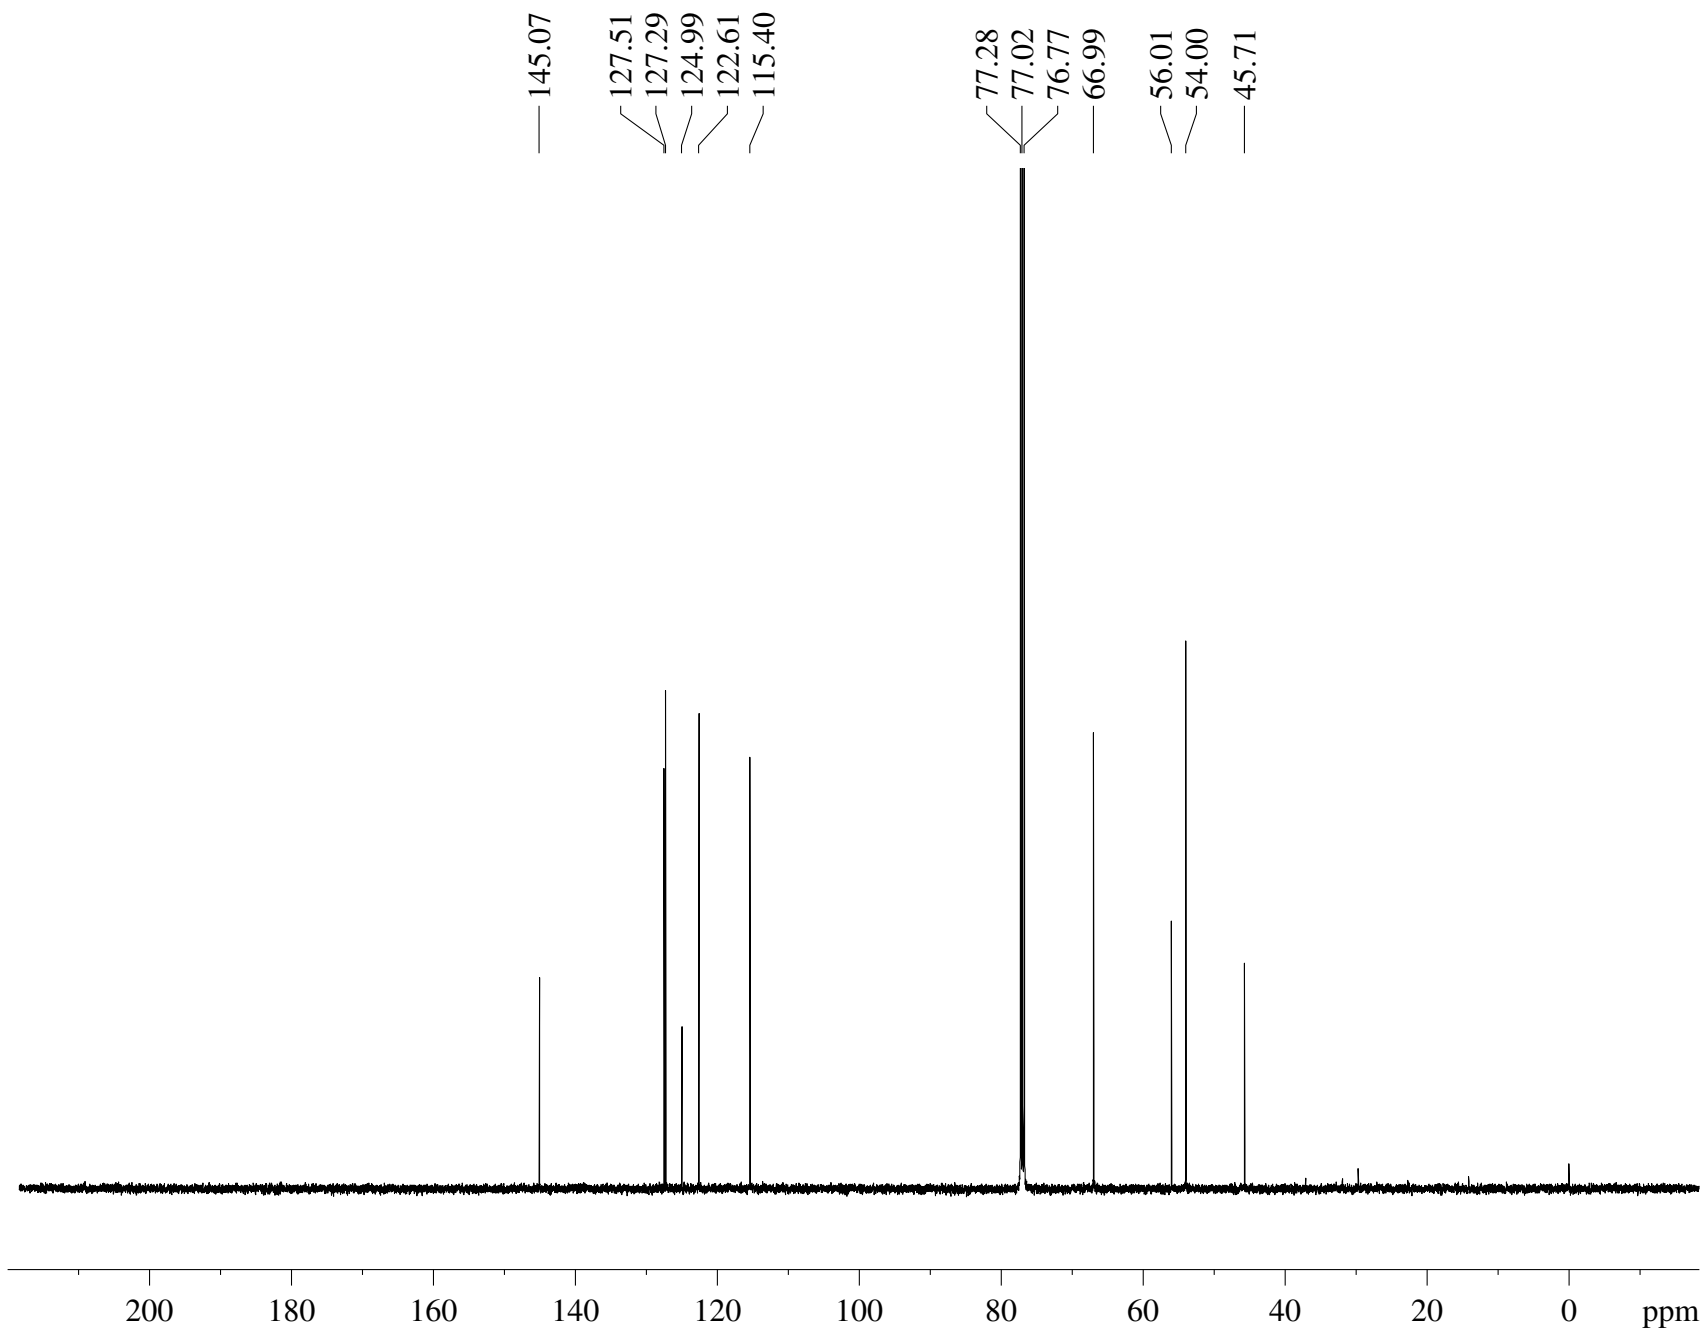

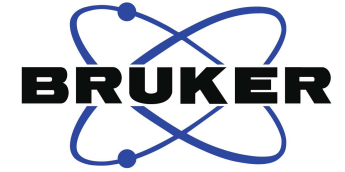

Current Data Parameters  
NAME May-18  
EXPNO 9  
PROCNO 1

F2 - Acquisition Parameters  
Date\_ 20180510  
Time 22.06  
INSTRUM spect  
PROBHD 5 mm PABBO BB/  
PULPROG zg30  
TD 65536  
SOLVENT CDC13  
NS 32  
DS 2  
SWH 10000.000 Hz  
FIDRES 0.152588 Hz  
AQ 3.2767999 sec  
RG 157.63  
DW 50.000 usec  
DE 6.50 usec  
TE 300.0 K  
D1 1.00000000 sec  
TD0 1

==== CHANNEL f1 =====  
SFO1 500.0530880 MHz  
NUC1 1H  
P1 12.15 usec  
PLW1 17.00000000 W

F2 - Processing parameters  
SI 65536  
SF 500.0500197 MHz  
WDW EM  
SSB 0  
LB 0.30 Hz  
GB 0  
PC 1.00

7.255  
7.163  
7.160  
7.147  
7.145  
7.144  
7.140  
7.137  
7.129  
7.124  
7.121  
6.929  
6.927  
6.925  
6.914  
6.911  
6.909  
6.901  
6.899

4.042  
4.028  
4.014  
3.730  
3.720  
3.711  
2.784  
2.770  
2.756  
2.545  
2.536  
2.527

7.160  
7.147  
7.145  
7.144  
7.140  
7.137  
7.129  
7.124  
7.121  
6.929  
6.927  
6.925  
6.914  
6.911  
6.909  
6.901

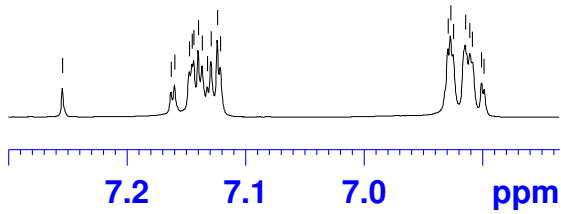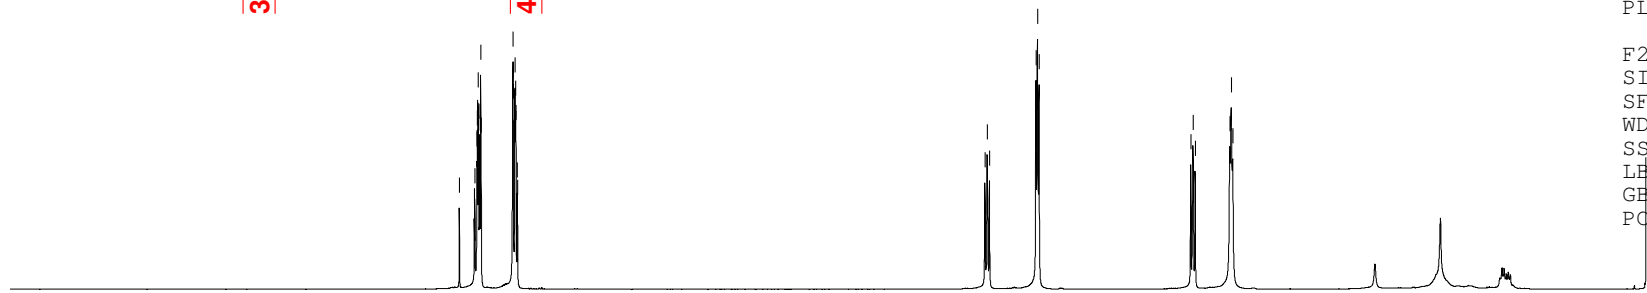

9 8 7 6 5 4 3 2 1 ppm

3.95  
4.00  
2.08  
4.09  
2.07  
3.98

VJ2

IIT, GN

17-Nov-2018 13:22:50

IITGN\_MIX\_13112018\_105 716 (4.498)

1: TOF MS ES+

1.82e6

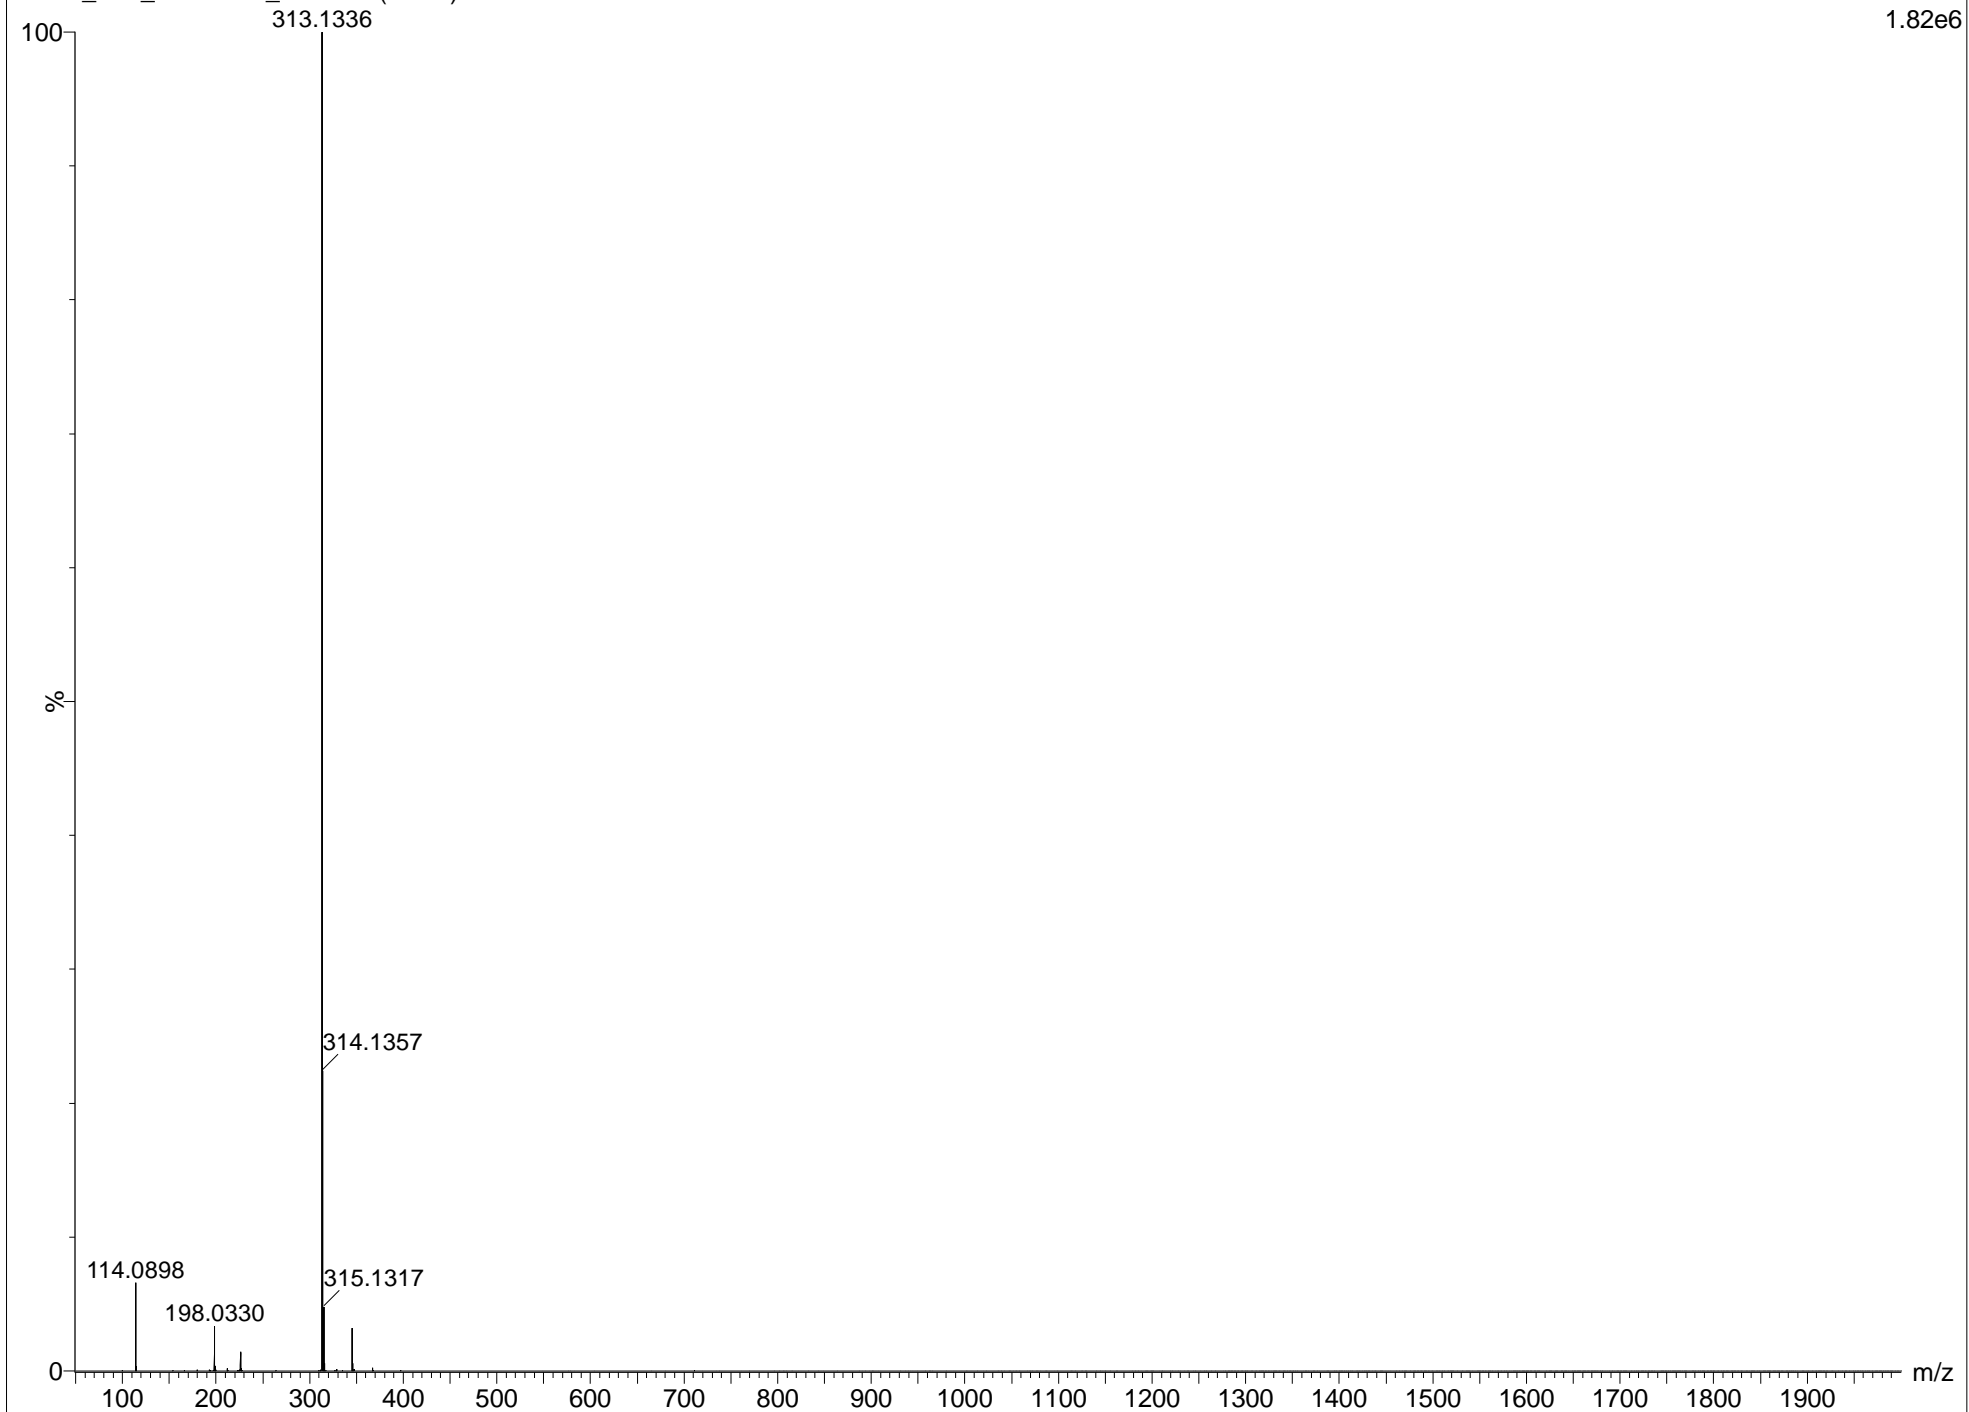

# checkCIF/PLATON report

Structure factors have been supplied for datablock(s) 2\_moxp\_lrt

THIS REPORT IS FOR GUIDANCE ONLY. IF USED AS PART OF A REVIEW PROCEDURE FOR PUBLICATION, IT SHOULD NOT REPLACE THE EXPERTISE OF AN EXPERIENCED CRYSTALLOGRAPHIC REFEREE.

No syntax errors found.      CIF dictionary      Interpreting this report

## Datablock: 2\_moxp\_lrt

---

Bond precision:    C-C = 0.0067 A                      Wavelength=1.54184

Cell:                      a=9.6623(8)      b=8.7108(7)      c=19.3352(18)  
                            alpha=90              beta=102.717(9)      gamma=90  
Temperature:              150 K

|                | Calculated     | Reported       |
|----------------|----------------|----------------|
| Volume         | 1587.5(2)      | 1587.5(2)      |
| Space group    | P 21/c         | P 1 21/c 1     |
| Hall group     | -P 2ybc        | -P 2ybc        |
| Moiety formula | C18 H20 N2 O S | C18 H20 N2 O S |
| Sum formula    | C18 H20 N2 O S | C18 H20 N2 O S |
| Mr             | 312.42         | 312.42         |
| Dx,g cm-3      | 1.307          | 1.307          |
| Z              | 4              | 4              |
| Mu (mm-1)      | 1.827          | 1.827          |
| F000           | 664.0          | 664.0          |
| F000'          | 666.98         |                |
| h,k,lmax       | 11,10,23       | 11,10,23       |
| Nref           | 2827           | 2728           |
| Tmin,Tmax      | 0.600,0.870    | 0.584,1.000    |
| Tmin'          | 0.496          |                |

Correction method= # Reported T Limits: Tmin=0.584 Tmax=1.000  
AbsCorr = MULTI-SCAN

Data completeness= 0.965                      Theta(max)= 66.768

R(reflections)= 0.0755( 1921)              wR2(reflections)= 0.3024( 2728)

S = 1.146                      Npar= 199

---

The following ALERTS were generated. Each ALERT has the format  
**test-name\_ALERT\_alert-type\_alert-level.**  
Click on the hyperlinks for more details of the test.



---

● **Alert level C**

|                   |                                           |           |   |         |        |
|-------------------|-------------------------------------------|-----------|---|---------|--------|
| PLAT029_ALERT_3_C | _diffn_measured_fraction_theta_full       | value Low | . | 0.965   | Why?   |
| PLAT084_ALERT_3_C | High wR2 Value (i.e. > 0.25)              | .....     |   | 0.30    | Report |
| PLAT340_ALERT_3_C | Low Bond Precision on C-C Bonds           | .....     |   | 0.00667 | Ang.   |
| PLAT906_ALERT_3_C | Large K Value in the Analysis of Variance | .....     |   | 2.674   | Check  |
| PLAT911_ALERT_3_C | Missing FCF Refl Between Thmin & STh/L=   | 0.596     |   | 100     | Report |
| PLAT977_ALERT_2_C | Check Negative Difference Density on H14B |           |   | -0.40   | eA-3   |

---

● **Alert level G**

|                   |                                                  |                  |   |       |        |
|-------------------|--------------------------------------------------|------------------|---|-------|--------|
| PLAT072_ALERT_2_G | SHELXL First Parameter in WGHT                   | Unusually Large  |   | 0.20  | Report |
| PLAT398_ALERT_2_G | Deviating C-O-C Angle From 120 for O1            |                  |   | 109.5 | Degree |
| PLAT909_ALERT_3_G | Percentage of I>2sig(I) Data at Theta(Max)       | Still            |   | 63%   | Note   |
| PLAT941_ALERT_3_G | Average HKL Measurement Multiplicity             | .....            |   | 1.7   | Low    |
| PLAT955_ALERT_1_G | Reported (CIF) and Actual (FCF) Lmax             | Differ by        | . | 1     | Units  |
| PLAT978_ALERT_2_G | Number C-C Bonds with Positive Residual Density. |                  |   | 2     | Info   |
| PLAT992_ALERT_5_G | Repd & Actual _reflns_number_gt                  | Values Differ by |   | 1     | Check  |

---

- 0 **ALERT level A** = Most likely a serious problem - resolve or explain  
0 **ALERT level B** = A potentially serious problem, consider carefully  
6 **ALERT level C** = Check. Ensure it is not caused by an omission or oversight  
7 **ALERT level G** = General information/check it is not something unexpected
- 1 ALERT type 1 CIF construction/syntax error, inconsistent or missing data  
4 ALERT type 2 Indicator that the structure model may be wrong or deficient  
7 ALERT type 3 Indicator that the structure quality may be low  
0 ALERT type 4 Improvement, methodology, query or suggestion  
1 ALERT type 5 Informative message, check
- 

## Validation response form

Please find below a validation response form (VRF) that can be filled in and pasted into your CIF.

```
# start Validation Reply Form
_vrf_PLAT029_2_moxp_lrt
;
PROBLEM: _diffn_measured_fraction_theta_full value Low .      0.965 Why?
RESPONSE: ...
;
_vrf_PLAT084_2_moxp_lrt
;
PROBLEM: High wR2 Value (i.e. > 0.25) .....      0.30 Report
RESPONSE: ...
;
_vrf_PLAT340_2_moxp_lrt
;
PROBLEM: Low Bond Precision on C-C Bonds .....      0.00667 Ang.
RESPONSE: ...
;
_vrf_PLAT906_2_moxp_lrt
;
PROBLEM: Large K Value in the Analysis of Variance .....      2.674 Check
RESPONSE: ...
;
_vrf_PLAT911_2_moxp_lrt
;
PROBLEM: Missing FCF Refl Between Thmin & STh/L=      0.596      100 Report
RESPONSE: ...
;
```

\_vrf\_PLAT977\_2\_moxp\_lrt

;

PROBLEM: Check Negative Difference Density on H14B

-0.40 eA-3

RESPONSE: ...

;

# end Validation Reply Form

---

It is advisable to attempt to resolve as many as possible of the alerts in all categories. Often the minor alerts point to easily fixed oversights, errors and omissions in your CIF or refinement strategy, so attention to these fine details can be worthwhile. In order to resolve some of the more serious problems it may be necessary to carry out additional measurements or structure refinements. However, the purpose of your study may justify the reported deviations and the more serious of these should normally be commented upon in the discussion or experimental section of a paper or in the "special\_details" fields of the CIF. checkCIF was carefully designed to identify outliers and unusual parameters, but every test has its limitations and alerts that are not important in a particular case may appear. Conversely, the absence of alerts does not guarantee there are no aspects of the results needing attention. It is up to the individual to critically assess their own results and, if necessary, seek expert advice.

### **Publication of your CIF in IUCr journals**

A basic structural check has been run on your CIF. These basic checks will be run on all CIFs submitted for publication in IUCr journals (*Acta Crystallographica*, *Journal of Applied Crystallography*, *Journal of Synchrotron Radiation*); however, if you intend to submit to *Acta Crystallographica Section C* or *E* or *IUCrData*, you should make sure that full publication checks are run on the final version of your CIF prior to submission.

### **Publication of your CIF in other journals**

Please refer to the *Notes for Authors* of the relevant journal for any special instructions relating to CIF submission.

---

**PLATON version of 22/04/2020; check.def file version of 09/03/2020**

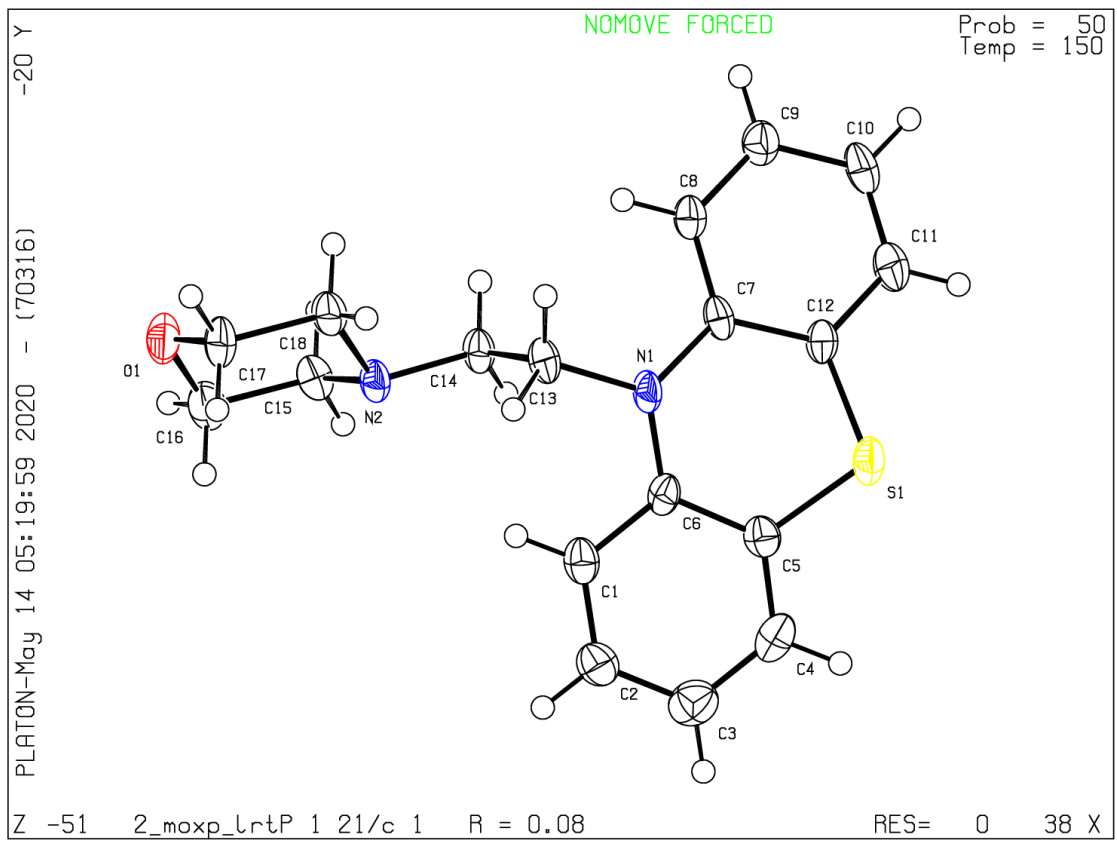

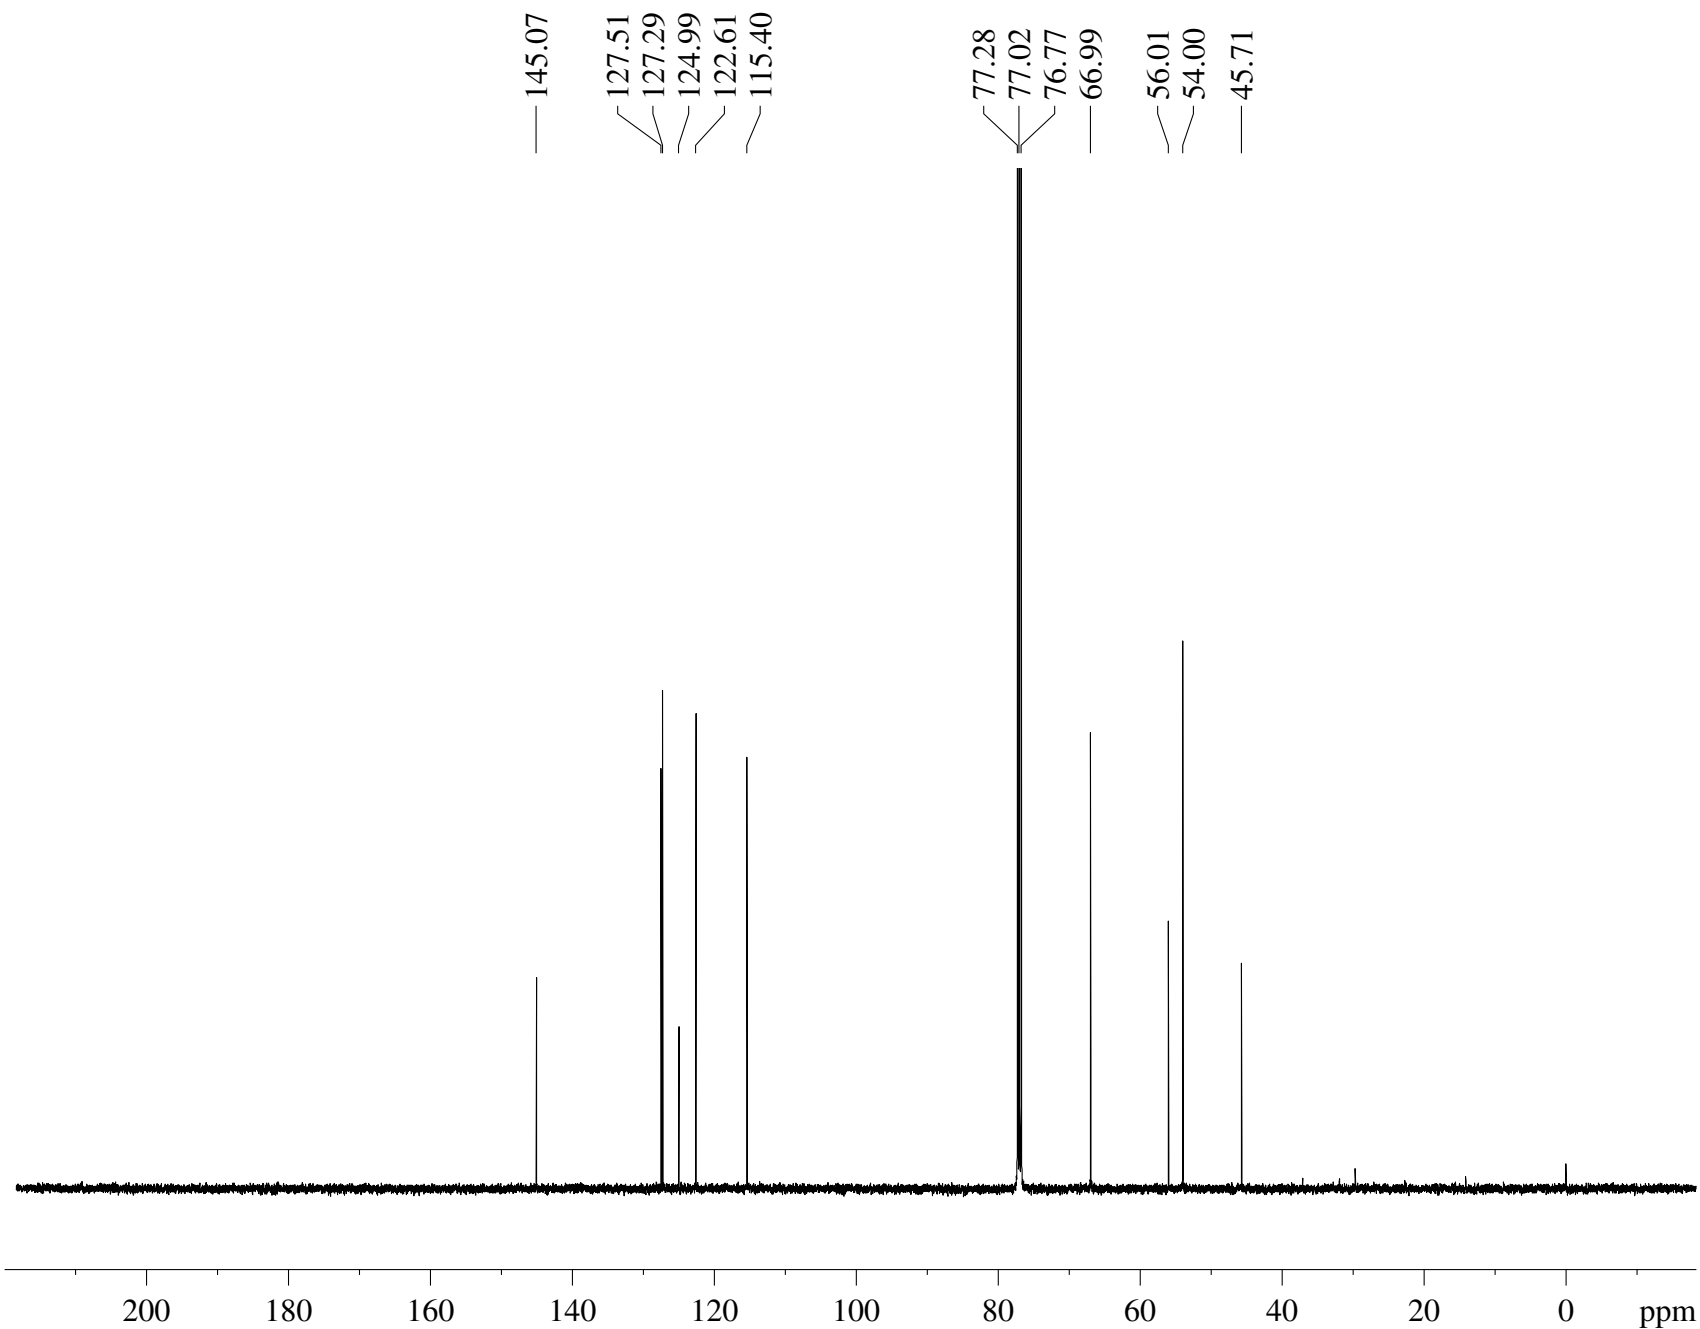

Current Data Parameter  
NAME May-1  
EXPNO 7  
PROCNO

F2 - Acquisition Param  
Date\_ 2018053  
Time 1.5  
INSTRUM spec  
PROBHD 5 mm PABBO BB  
PULPROG zgpg3  
TD 6553  
SOLVENT CDCl  
NS 204  
DS  
SWH 29761.90  
FIDRES 0.45413  
AQ 1.101004  
RG 200.0  
DW 16.80  
DE 6.5  
TE 300.  
D1 2.0000000  
D11 0.0300000  
TDO

==== CHANNEL f1 ==  
SFO1 125.750245  
NUC1 13  
P1 8.9  
PLW1 29.0000000

==== CHANNEL f2 ==  
SFO2 500.052000  
NUC2 1  
PCPD2 80.0  
PLW2 17.0000000  
PLW12 0.5206199  
PLW13 0.3332000

F2 - Processing parame  
SI 3276  
SF 125.737673  
WDW E  
SSB 0  
LB 1.0  
GB 0  
PC 1.4



Current Data Parameters  
NAME May-18  
EXPNO 9  
PROCNO 1

F2 - Acquisition Parameters  
Date\_ 20180510  
Time 22.06  
INSTRUM spect  
PROBHD 5 mm PABBO BB/  
PULPROG zg30  
TD 65536  
SOLVENT CDC13  
NS 32  
DS 2  
SWH 10000.000 Hz  
FIDRES 0.152588 Hz  
AQ 3.2767999 sec  
RG 157.63  
DW 50.000 usec  
DE 6.50 usec  
TE 300.0 K  
D1 1.00000000 sec  
TD0 1

==== CHANNEL f1 =====  
SFO1 500.0530880 MHz  
NUC1 1H  
P1 12.15 usec  
PLW1 17.00000000 W

F2 - Processing parameters  
SI 65536  
SF 500.0500197 MHz  
WDW EM  
SSB 0  
LB 0.30 Hz  
GB 0  
PC 1.00

7.255  
7.163  
7.160  
7.147  
7.145  
7.144  
7.140  
7.137  
7.129  
7.124  
7.121  
6.929  
6.927  
6.925  
6.914  
6.911  
6.909  
6.901  
6.899

4.042  
4.028  
4.014  
3.730  
3.720  
3.711  
2.784  
2.770  
2.756  
2.545  
2.536  
2.527

7.160  
7.147  
7.145  
7.144  
7.140  
7.137  
7.129  
7.124  
7.121  
6.929  
6.927  
6.925  
6.914  
6.911  
6.909  
6.901

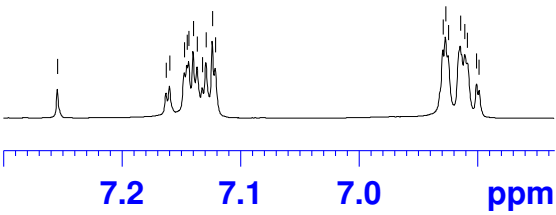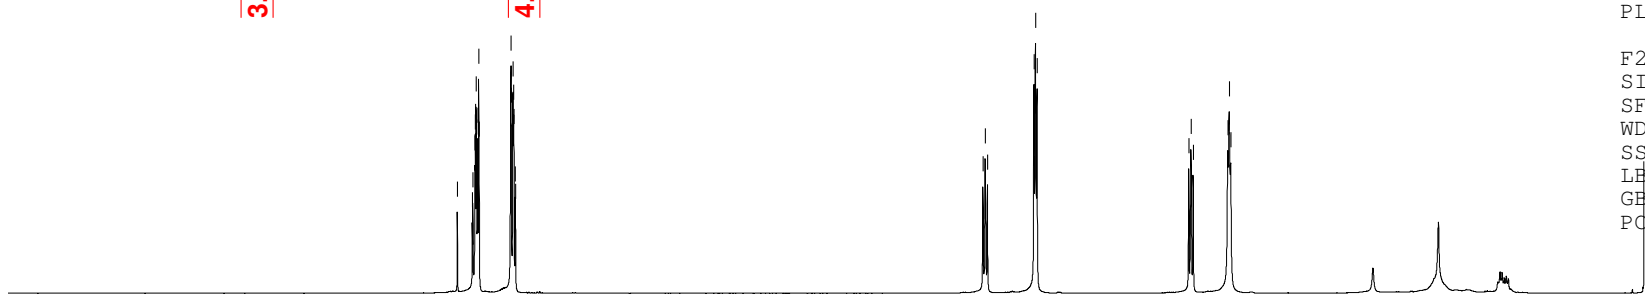

9  
8  
7  
6  
5  
4  
3  
2  
1  
ppm

3.95  
4.00  
2.08  
4.09  
2.07  
3.98

VJ2

IIT, GN

17-Nov-2018 13:22:50

IITGN\_MIX\_13112018\_105 716 (4.498)

1: TOF MS ES+

1.82e6



# checkCIF/PLATON report

Structure factors have been supplied for datablock(s) 2\_moxp\_lrt

THIS REPORT IS FOR GUIDANCE ONLY. IF USED AS PART OF A REVIEW PROCEDURE FOR PUBLICATION, IT SHOULD NOT REPLACE THE EXPERTISE OF AN EXPERIENCED CRYSTALLOGRAPHIC REFEREE.

No syntax errors found.      CIF dictionary      Interpreting this report

## Datablock: 2\_moxp\_lrt

---

Bond precision:    C-C = 0.0067 A                      Wavelength=1.54184

Cell:                      a=9.6623(8)      b=8.7108(7)      c=19.3352(18)  
                            alpha=90              beta=102.717(9)      gamma=90  
Temperature:              150 K

|                | Calculated     | Reported       |
|----------------|----------------|----------------|
| Volume         | 1587.5(2)      | 1587.5(2)      |
| Space group    | P 21/c         | P 1 21/c 1     |
| Hall group     | -P 2ybc        | -P 2ybc        |
| Moiety formula | C18 H20 N2 O S | C18 H20 N2 O S |
| Sum formula    | C18 H20 N2 O S | C18 H20 N2 O S |
| Mr             | 312.42         | 312.42         |
| Dx,g cm-3      | 1.307          | 1.307          |
| Z              | 4              | 4              |
| Mu (mm-1)      | 1.827          | 1.827          |
| F000           | 664.0          | 664.0          |
| F000'          | 666.98         |                |
| h,k,lmax       | 11,10,23       | 11,10,23       |
| Nref           | 2827           | 2728           |
| Tmin,Tmax      | 0.600,0.870    | 0.584,1.000    |
| Tmin'          | 0.496          |                |

Correction method= # Reported T Limits: Tmin=0.584 Tmax=1.000  
AbsCorr = MULTI-SCAN

Data completeness= 0.965                      Theta(max)= 66.768

R(reflections)= 0.0755( 1921)              wR2(reflections)= 0.3024( 2728)

S = 1.146                      Npar= 199

---

The following ALERTS were generated. Each ALERT has the format  
**test-name\_ALERT\_alert-type\_alert-level.**  
Click on the hyperlinks for more details of the test.

---

● **Alert level C**

|                   |                                                 |         |        |
|-------------------|-------------------------------------------------|---------|--------|
| PLAT029_ALERT_3_C | _diffn_measured_fraction_theta_full value Low . | 0.965   | Why?   |
| PLAT084_ALERT_3_C | High wR2 Value (i.e. > 0.25) .....              | 0.30    | Report |
| PLAT340_ALERT_3_C | Low Bond Precision on C-C Bonds .....           | 0.00667 | Ang.   |
| PLAT906_ALERT_3_C | Large K Value in the Analysis of Variance ..... | 2.674   | Check  |
| PLAT911_ALERT_3_C | Missing FCF Refl Between Thmin & STh/L= 0.596   | 100     | Report |
| PLAT977_ALERT_2_C | Check Negative Difference Density on H14B       | -0.40   | eA-3   |

---

● **Alert level G**

|                   |                                                  |       |        |
|-------------------|--------------------------------------------------|-------|--------|
| PLAT072_ALERT_2_G | SHELXL First Parameter in WGHT Unusually Large   | 0.20  | Report |
| PLAT398_ALERT_2_G | Deviating C-O-C Angle From 120 for O1            | 109.5 | Degree |
| PLAT909_ALERT_3_G | Percentage of I>2sig(I) Data at Theta(Max) Still | 63%   | Note   |
| PLAT941_ALERT_3_G | Average HKL Measurement Multiplicity .....       | 1.7   | Low    |
| PLAT955_ALERT_1_G | Reported (CIF) and Actual (FCF) Lmax Differ by . | 1     | Units  |
| PLAT978_ALERT_2_G | Number C-C Bonds with Positive Residual Density. | 2     | Info   |
| PLAT992_ALERT_5_G | Repd & Actual _reflns_number_gt Values Differ by | 1     | Check  |

---

- 0 **ALERT level A** = Most likely a serious problem - resolve or explain  
0 **ALERT level B** = A potentially serious problem, consider carefully  
6 **ALERT level C** = Check. Ensure it is not caused by an omission or oversight  
7 **ALERT level G** = General information/check it is not something unexpected
- 1 ALERT type 1 CIF construction/syntax error, inconsistent or missing data  
4 ALERT type 2 Indicator that the structure model may be wrong or deficient  
7 ALERT type 3 Indicator that the structure quality may be low  
0 ALERT type 4 Improvement, methodology, query or suggestion  
1 ALERT type 5 Informative message, check
- 

## Validation response form

Please find below a validation response form (VRF) that can be filled in and pasted into your CIF.

```
# start Validation Reply Form
_vrf_PLAT029_2_moxp_lrt
;
PROBLEM: _diffn_measured_fraction_theta_full value Low .      0.965 Why?
RESPONSE: ...
;
_vrf_PLAT084_2_moxp_lrt
;
PROBLEM: High wR2 Value (i.e. > 0.25) ....., 0.30 Report
RESPONSE: ...
;
_vrf_PLAT340_2_moxp_lrt
;
PROBLEM: Low Bond Precision on C-C Bonds ....., 0.00667 Ang.
RESPONSE: ...
;
_vrf_PLAT906_2_moxp_lrt
;
PROBLEM: Large K Value in the Analysis of Variance ....., 2.674 Check
RESPONSE: ...
;
_vrf_PLAT911_2_moxp_lrt
;
PROBLEM: Missing FCF Refl Between Thmin & STh/L= 0.596      100 Report
RESPONSE: ...
;
```



\_vrf\_PLAT977\_2\_moxp\_lrt

;

PROBLEM: Check Negative Difference Density on H14B

-0.40 eA-3

RESPONSE: ...

;

# end Validation Reply Form

---

It is advisable to attempt to resolve as many as possible of the alerts in all categories. Often the minor alerts point to easily fixed oversights, errors and omissions in your CIF or refinement strategy, so attention to these fine details can be worthwhile. In order to resolve some of the more serious problems it may be necessary to carry out additional measurements or structure refinements. However, the purpose of your study may justify the reported deviations and the more serious of these should normally be commented upon in the discussion or experimental section of a paper or in the "special\_details" fields of the CIF. checkCIF was carefully designed to identify outliers and unusual parameters, but every test has its limitations and alerts that are not important in a particular case may appear. Conversely, the absence of alerts does not guarantee there are no aspects of the results needing attention. It is up to the individual to critically assess their own results and, if necessary, seek expert advice.

### **Publication of your CIF in IUCr journals**

A basic structural check has been run on your CIF. These basic checks will be run on all CIFs submitted for publication in IUCr journals (*Acta Crystallographica*, *Journal of Applied Crystallography*, *Journal of Synchrotron Radiation*); however, if you intend to submit to *Acta Crystallographica Section C* or *E* or *IUCrData*, you should make sure that full publication checks are run on the final version of your CIF prior to submission.

### **Publication of your CIF in other journals**

Please refer to the *Notes for Authors* of the relevant journal for any special instructions relating to CIF submission.

---

**PLATON version of 22/04/2020; check.def file version of 09/03/2020**



Supplement: mmc4.pdf [file mmc4.pdf]
